# Supplementary material for: High-concentrate feeding upregulates the expression of inflammation-related genes in the ruminal epithelium of dairy cattle
Source: PubMed Central journal article supplement (PMC4966727; doi:10.1186/s40104-016-0100-1), 2016-07-29
Supplement: 40104_2016_100_MOESM2_ESM.pdf [file 40104_2016_100_MOESM2_ESM.pdf]

Table S2 List of differentially expressed genes

| GeneBankAcc  | Symbol    | <i>P</i> value | FC    | Description                                                |
|--------------|-----------|----------------|-------|------------------------------------------------------------|
| XM_590017    | LOC512493 | 0.048          | -1.70 | similar to KIAA2022 protein                                |
| XM_865303    | LOC614010 | 0.047          | -2.13 | PREDICTED: Bos taurus similar to fatty acid desaturase 2   |
| EE959717     | K40110A   | 0.005          | -1.75 | FNM Bos taurus cDNA clone K4011 5-                         |
| XM_002692067 | IL15RA    | 0.026          | -1.50 | interleukin 15 receptor, alpha                             |
| NM_001025332 | FABP2     | 0.029          | -2.31 | fatty acid binding protein 2, intestinal                   |
| NM_175715    | ADCYAP1R1 | 0.034          | -1.50 | adenylate cyclase activating polypeptide 1 receptor type I |
| XM_616648    | TDRD1     | 0.024          | 1.73  | tudor domain containing 1                                  |
| NM_001034252 | FBXL21    | 0.002          | -1.58 | Bos taurus F-box and leucine-rich repeat protein 21        |
| EE892165     | A79630A   | 0.022          | 2.93  | FFB Bos taurus cDNA clone A7963 5-                         |
| XM_001789260 | ROR1      | 0.022          | 1.61  | receptor tyrosine kinase-like orphan receptor 1            |
| NM_001025348 | SPINK1    | 0.010          | -2.08 | serine peptidase inhibitor, Kazal type 1                   |
| NM_001206380 | SLC12A5   | 0.010          | -2.37 | solute carrier family 12, member 5                         |
| NM_001102095 | CCDC85A   | 0.015          | 2.22  | coiled-coil domain containing 85A                          |
| NM_001192816 | LGI2      | 0.011          | -1.77 | leucine-rich repeat LGI family, member 2                   |
| XM_866198    | LOC614634 | 0.030          | -1.70 | similar to glutamate receptor delta-1 subunit              |
| NM_001101973 | TMPRSS4   | 0.050          | 1.55  | transmembrane protease, serine 4                           |
| XM_604089    | GPR176    | 0.009          | 1.76  | G protein-coupled receptor 176                             |
| NM_001078060 | DMRT1     | 0.003          | -2.20 | doublesex and mab-3 related transcription factor 1         |
| CB433840     |           | 0.045          | -1.67 | MARC 6BOV Bos taurus cDNA 3-                               |
| NM_001102190 | RIMS2     | 0.023          | 1.65  | regulating synaptic membrane exocytosis 2                  |
| NM_001192873 | HOXC11    | 0.008          | -7.83 | homeobox C11                                               |
| XM_581197    | TSC2      | 0.018          | -2.39 | similar to tuberous sclerosis 2                            |
| BI538290     | CPLX2     | 0.037          | -2.17 | MARC 4BOV Bos taurus cDNA 5-                               |
| CB423555     |           | 0.013          | -1.50 | MARC 6BOV Bos taurus cDNA 5-                               |
| BC134447     | TP53RK    | 0.021          | 1.50  | TP53 regulating kinase                                     |
| XM_002698016 | ACSM4     | 0.042          | -2.27 | acyl-CoA synthetase medium-chain family member 4           |
| XM_002688104 | LOC511618 | 0.021          | 2.77  | similar to rCG28550                                        |
| NM_001075662 | SDS       | 0.049          | 4.74  | serine dehydratase                                         |
| NM_001076092 | DZIP3     | 0.043          | 1.54  | DAZ interacting protein 3, zinc finger                     |

|              |           |       |       |                                                                           |
|--------------|-----------|-------|-------|---------------------------------------------------------------------------|
| BI848985     | ALOX15    | 0.043 | 1.54  | MARC 2BOV Bos taurus cDNA 5-                                              |
| NM_001076303 | COLEC11   | 0.046 | -1.53 | collectin sub-family member 11                                            |
| EE911885     | A47701A   | 0.029 | -1.66 | FFB Bos taurus cDNA clone A4770 3-                                        |
| NM_001206185 | SEMA7A    | 0.050 | 1.54  | semaphorin 7A, GPI membrane anchor                                        |
| NM_174177    | SCIN      | 0.040 | 1.50  | scinderin                                                                 |
| XM_601937    | LOC523635 | 0.032 | 1.52  | similar to UPF0183 protein                                                |
| NM_174786    | GUCA1B    | 0.000 | -2.16 | guanylate cyclase activator 1B (retina)                                   |
| EU581635     | FIGLA     | 0.003 | 1.83  | folliculogenesis specific basic helix-loop-helix                          |
| NM_001098075 | SCNN1B    | 0.045 | 1.51  | sodium channel, nonvoltage-gated 1, beta                                  |
| NM_001080369 | MGC139448 | 0.044 | 1.92  | hypothetical protein LOC787473                                            |
| NM_174446    | RAB3A     | 0.013 | -1.78 | RAB3A, member RAS oncogene family                                         |
| NM_001079771 | SMOC1     | 0.015 | -2.15 | SPARC related modular calcium binding 1                                   |
| NM_001205915 | SMG1      | 0.020 | 1.62  | smg-1 homolog, phosphatidylinositol 3-kinase-related kinase               |
| XM_600422    | LOC522147 | 0.050 | -1.61 | similar to obscurin, cytoskeletal calmodulin and titin-interacting RhoGEF |
| NM_001083719 | MYLK2     | 0.045 | 1.72  | myosin light chain kinase 2                                               |
| NM_001015680 | NAPEPLD   | 0.026 | 1.61  | N-acyl phosphatidylethanolamine phospholipase D                           |
| NM_001191378 | KCND3     | 0.044 | -1.75 | potassium voltage-gated channel, Shal-related subfamily, member 3         |
| CB535104     | 768488    | 0.002 | 1.92  | MARC 6BOV Bos taurus cDNA 3-                                              |
| NM_174292    | CRYGS     | 0.015 | 1.51  | crystallin, gamma                                                         |
| NM_001075746 | GBP5      | 0.043 | 1.50  | guanylate binding protein 5                                               |
| ENSBTAT0000  | TCN1      | 0.047 | 3.15  | transcobalamin I (vitamin B12 binding protein, R binder family)           |
| XM_580797    | MUC20     | 0.034 | 1.54  | mucin 20, cell surface associated                                         |
| XM_870023    | EFNB3     | 0.020 | 2.49  | ephrin-B3                                                                 |
| XM_002686666 | DLX6      | 0.035 | 1.86  | distal-less homeobox 6                                                    |
| XM_612284    | TTC21A    | 0.046 | -1.50 | tetratricopeptide repeat domain 21A                                       |
| XM_592866    | HTRA4     | 0.027 | 1.85  | HtrA serine peptidase 4                                                   |
| XM_866835    | LOC615115 | 0.026 | -1.68 | similar to OTTHUMP00000016363                                             |
| NM_001206259 | CRISP1    | 0.050 | -1.61 | cysteine-rich secretory protein 1                                         |
| XM_591914    | SFT2D3    | 0.042 | 2.56  | SFT2 domain containing 3                                                  |
| XM_602209    | LOC523898 | 0.021 | -1.60 | similar to sulfotransferase K1                                            |
| XM_617812    | SYT6      | 0.026 | 1.66  | synaptotagmin VI                                                          |
| NM_001205848 | PDILT     | 0.017 | -1.79 | protein disulfide isomerase-like, testis expressed                        |

|              |           |       |       |                                                                                    |
|--------------|-----------|-------|-------|------------------------------------------------------------------------------------|
| NM_001101222 | GDAP1     | 0.047 | 1.50  | ganglioside-induced differentiation-associated protein 1                           |
| NM_001192534 | MKX       | 0.042 | -2.04 | mohawk homeobox                                                                    |
| NM_001113762 | ICAM5     | 0.039 | 1.50  | intercellular adhesion molecule 5, telencephalin                                   |
| NM_001198991 | CR2       | 0.006 | 1.76  | complement component (3d/Epstein Barr virus) receptor 2                            |
| XM_594203    | LOC516067 | 0.026 | -2.73 | similar to folate receptor 1 precursor, transcript variant 1                       |
| XM_614208    | LOC534441 | 0.035 | -1.71 | similar to Huntingtin interacting protein K, transcript variant 1                  |
| NM_001075523 | KRT25     | 0.014 | -1.95 | keratin 25                                                                         |
| XM_586585    | FRMPD4    | 0.014 | -1.92 | FERM and PDZ domain containing 4                                                   |
| NM_001102558 | CX3CR1    | 0.042 | 1.50  | chemokine (C-X3-C motif) receptor 1                                                |
| CB451845     |           | 0.003 | -1.55 | MARC 6BOV Bos taurus cDNA 3-                                                       |
| NM_001038682 | AICDA     | 0.016 | -2.35 | activation-induced cytidine deaminase                                              |
| NM_174300    | CXCL6     | 0.050 | 1.61  | chemokine (C-X-C motif) ligand 6                                                   |
| NM_001078017 | LOC538872 | 0.020 | -1.59 | similar to Dual specificity protein phosphatase 18                                 |
| NM_001034345 | CCL19     | 0.042 | 1.79  | chemokine (C-C motif) ligand 19                                                    |
| NM_001080738 | LRRN1     | 0.019 | -1.67 | leucine rich repeat neuronal 1                                                     |
| NM_001001145 | BSP1      | 0.026 | -1.81 | binder of sperm 1                                                                  |
| XM_865022    | CEP112    | 0.023 | -1.71 | coiled-coil domain containing 46                                                   |
| CR851521     |           | 0.040 | 2.17  | Normalized and Subtracted endometrium tissues cDNA clone                           |
| XM_864903    | LOC613791 | 0.038 | -2.41 | similar to pregnancy-associated glycoprotein-18                                    |
| NM_001075545 | DHRS7C    | 0.050 | -1.51 | dehydrogenase/reductase (SDR family) member 7C                                     |
| NM_001012678 | BOLA-DYA  | 0.001 | 2.14  | major histocompatibility complex, class II, DY alpha                               |
| NM_001206235 | LOC616136 | 0.024 | 1.50  | hypothetical LOC616136                                                             |
| XM_609180    | ATP12A    | 0.017 | 3.66  | ATPase, H <sup>+</sup> /K <sup>+</sup> transporting, nongastric, alpha polypeptide |
| XM_880264    | LOC527819 | 0.048 | 2.07  | similar to keratin 4, transcript variant 3                                         |
| XM_588578    | LOC539654 | 0.023 | 1.64  | similar to protocadherin gamma subfamily A, 2                                      |
| XM_585407    | LOC508610 | 0.002 | -2.20 | similar to olfactory receptor, family 4, subfamily C, member 45                    |
| XM_869779    | LOC617506 | 0.003 | 1.81  | similar to homeo box (H6 family) 2                                                 |
| NM_001083745 | GTF2IRD2  | 0.042 | 1.92  | GTF2I repeat domain containing 2                                                   |
| AW658518     |           | 0.014 | 1.97  | MARC 1BOV Bos taurus cDNA 5-                                                       |
| XM_001789474 | LOC526286 | 0.009 | -1.57 | similar to olfactory receptor MOR223-1                                             |
| BI681020     |           | 0.011 | 1.93  | MARC 1BOV Bos taurus cDNA 5-, mRNA sequence                                        |
| NM_173923    | IL6       | 0.026 | -1.60 | interleukin 6 (interferon, beta 2)                                                 |

|              |           |       |       |                                                                          |
|--------------|-----------|-------|-------|--------------------------------------------------------------------------|
| XM_589391    | TNIP3     | 0.022 | 4.98  | similar to TNFAIP3 interacting protein 3                                 |
| XM_001788558 | THOC1     | 0.032 | 2.21  | THO complex 1                                                            |
| NM_174386    | MFAP5     | 0.045 | 1.82  | Bos taurus microfibrillar associated protein 5                           |
| DV880987     | FUT11     | 0.020 | -1.63 | fucosyltransferase 11 (alpha (1,3) fucosyltransferase)                   |
| XM_596187    | LOC518005 | 0.018 | 2.20  | similar to NM23-H8                                                       |
| XM_866469    | LOC614829 | 0.039 | -1.87 | similar to AMP-activated protein kinase alpha 2 catalytic subunit        |
| XM_870215    | LOC617885 | 0.041 | 1.57  | similar to amyloid beta A4 precursor protein-binding, family A, member 1 |
| XM_002697311 | PKHD1     | 0.017 | -2.08 | polycystic kidney and hepatic disease 1 , transcript variant X3          |
| NM_001033610 | KRT8      | 0.014 | -1.55 | keratin 8                                                                |
| XM_606357    | LOC527950 | 0.025 | -1.73 | similar to potassium voltage-gated channel, subfamily H , member 7       |
| XM_867323    | CD226     | 0.036 | 1.77  | CD226 molecule, transcript variant X1                                    |
| XM_591375    | LOC540082 | 0.024 | 1.51  | similar to olfactory receptor, family 1, subfamily A, member 1           |
| NM_001076870 | IHH       | 0.042 | -1.66 | Indian hedgehog homolog (Drosophila)                                     |
| NM_001034599 | MGC128811 | 0.032 | -1.74 | chromosome 28 open reading frame, human C10orf58                         |
| NM_001206059 | GRIA3     | 0.014 | 2.53  | glutamate receptor, ionotropic, AMPA 3                                   |
| XM_580713    | LOC507882 | 0.050 | 1.80  | similar to mCG53389                                                      |
| NM_001076912 | SCN4B     | 0.042 | -1.55 | sodium channel, voltage-gated, type IV, beta                             |
| EE896477     | B02260A   | 0.016 | 1.54  | FFB Bos taurus cDNA clone B0226 5-                                       |
| NM_174391    | MMP20     | 0.010 | -1.50 | matrix metalloproteinase 20                                              |
| XM_592737    | LOC514827 | 0.049 | -1.80 | similar to ATP-binding cassette, sub-family C, member 4                  |
| NM_001076954 | GOLGA7B   | 0.035 | -1.92 | golgi autoantigen, golgin subfamily a, 7B                                |
| CB417821     | SP5       | 0.044 | 1.51  | Sp5 transcription factor                                                 |
| XM_599713    | LOC521449 | 0.027 | 2.05  | hypothetical protein FLJ32310                                            |
| XM_590420    | ARL14     | 0.024 | 1.74  | ADP-ribosylation factor-like 14                                          |
| NM_001012675 | BOLA-DQA5 | 0.017 | 1.58  | major histocompatibility complex, class II, DQ alpha 5                   |
| NM_001205963 | SYT15     | 0.021 | -2.07 | synaptotagmin XV                                                         |
| NM_001192570 | TREH      | 0.041 | -1.66 | trehalase (brush-border membrane glycoprotein)                           |
| XM_599343    | LOC521086 | 0.019 | -1.62 | similar to poly(A) binding protein, cytoplasmic 1-like 2B                |
| XM_603860    | KCNA3     | 0.001 | 1.65  | potassium voltage-gated channel, shaker-related subfamily, member 3      |
| NM_001205842 | INHBE     | 0.023 | 1.51  | inhibin, beta E                                                          |
| NM_177517    | ST6GAL1   | 0.014 | 2.07  | ST6 beta-galactosamide alpha-2,6-sialyltransferase 1                     |
| NM_001076020 | CADPS     | 0.006 | -1.82 | Ca <sup>++</sup> -dependent secretion activator                          |

|              |             |       |       |                                                                   |
|--------------|-------------|-------|-------|-------------------------------------------------------------------|
| XM_612626    | LOC533271   | 0.042 | -1.51 | similar to glutamate receptor, metabotropic 8                     |
| DY168909     | SIGLEC12    | 0.022 | 1.73  | sialic acid binding Ig-like lectin 12                             |
| NM_174093    | IL1 $\beta$ | 0.050 | 1.58  | interleukin 1, beta                                               |
| NM_176618    | PAG7        | 0.030 | -2.07 | pregnancy-associated glycoprotein 7, transcript variant 1         |
| NM_001192828 | RRAGD       | 0.005 | -1.90 | Ras-related GTP binding D                                         |
| XM_865961    | LOC614450   | 0.005 | 1.63  | similar to NOPAR2                                                 |
| XM_586824    | HSD11B1     | 0.021 | -1.81 | similar to hydroxysteroid (11-beta) dehydrogenase 1               |
| XM_606959    | CDK5R2      | 0.013 | -1.50 | similar to cyclin-dependent kinase 5, regulatory subunit 2 (p39)  |
| XM_865596    | LOC614197   | 0.036 | -1.58 | similar to Uncharacterized protein C14orf105                      |
| NM_001012285 | LEPR        | 0.017 | 1.78  | Bos taurus leptin receptor                                        |
| NM_001191270 | KLF12       | 0.032 | 1.53  | Kruppel-like factor 12                                            |
| L13938       | PLCB4       | 0.007 | 1.65  | Bovine phospholipase C                                            |
| XM_580794    | HTR7        | 0.016 | -2.21 | 5-hydroxytryptamine receptor 7                                    |
| XM_868456    | LOC616432   | 0.021 | -1.57 | similar to proline rich membrane anchor 1                         |
| AW670011     | AFF2        | 0.013 | -2.23 | similar to AF4/FMR2 family, member 2                              |
| NM_001206604 | LOC524694   | 0.039 | -2.04 | similar to Paladin                                                |
| NM_001035336 | TNFRSF9     | 0.048 | 1.80  | tumor necrosis factor receptor superfamily, member 9              |
| NM_174733    | DHRS9       | 0.023 | 1.53  | dehydrogenase/reductase (SDR family) member 9                     |
| NM_173953    | PRL         | 0.018 | 1.57  | prolactin                                                         |
| EE970120     | Q23660A     | 0.011 | 2.76  | Q23660A FNM Bos taurus cDNA clone Q2366 5-                        |
| NM_001037469 | MGC133641   | 0.034 | 1.56  | similar to Homo sapiens histone 1, H2bc                           |
| XM_615275    | LOC535243   | 0.029 | 1.53  | similar to cytochrome P450, family 2, subfamily C, polypeptide 18 |
| EE904857     | B50401A     | 0.042 | -1.52 | B50401A FFB Bos taurus cDNA clone B5040 3-                        |
| XM_580533    | CHL1        | 0.033 | -8.23 | similar to cell adhesion molecule with homology to L1CAM          |
| XM_594382    | ASCL1       | 0.026 | -2.08 | similar to achaete-scute complex-like 1 (Drosophila)              |
| NM_001105212 | KIF17       | 0.012 | -1.70 | kinesin family member 17                                          |
| NM_001046600 | RGS4        | 0.027 | 1.59  | regulator of G-protein signaling 4                                |
| XM_003582049 | ABCA13      | 0.008 | -1.65 | ATP-binding cassette, sub-family A, member 13                     |
| NM_001046064 | OIT3        | 0.005 | 3.21  | oncoprotein induced transcript 3                                  |
| BC148911     | TRDN        | 0.006 | -2.55 | triadin                                                           |
| NM_001035107 | TINAG       | 0.025 | -1.54 | tubulointerstitial nephritis antigen                              |
| BC110200     | H1FNT       | 0.013 | 2.28  | H1 histone family, member N, testis-specific                      |

|              |            |       |       |                                                                         |
|--------------|------------|-------|-------|-------------------------------------------------------------------------|
| NM_001077838 | SFTPA1     | 0.031 | -1.70 | surfactant protein A1                                                   |
| NM_001206490 | ITGB3      | 0.016 | 1.91  | integrin, beta 3 (platelet glycoprotein IIIa, antigen CD61)             |
| NM_001075615 | TXNDC6     | 0.027 | -1.66 | thioredoxin domain containing 6                                         |
| NM_001192846 | SLCO4C1    | 0.013 | 1.54  | solute carrier organic anion transporter family, member 4C1             |
| NM_174373    | KCNJ2      | 0.005 | 1.50  | potassium inwardly-rectifying channel, subfamily J, member 2            |
| XM_580632    | OR2D2      | 0.041 | 1.55  | olfactory receptor, family 2, subfamily D, member 2                     |
| XM_582699    | TMEM221    | 0.030 | 1.99  | transmembrane protein 221                                               |
| AW430375     | SLC38A4    | 0.036 | 1.87  | solute carrier family 38, member 4                                      |
| NM_001102293 | PTPN5      | 0.010 | 1.77  | protein tyrosine phosphatase, non-receptor type 5                       |
| CB451858     | CREB1      | 0.014 | -2.29 | cAMP responsive element binding protein 1, transcript variant A         |
| EE944005     | G64131A    | 0.034 | 1.61  | Intronic region in predicted Homo sapiens hypothetical protein FLJ34690 |
| NM_001075630 | VAMP1      | 0.013 | -1.70 | vesicle-associated membrane protein 1 (synaptobrevin 1)                 |
| XM_599201    | LOC520949  | 0.030 | 1.70  | similar to KIAA0416, transcript variant 1                               |
| XM_002696448 | LOC783755  | 0.009 | 1.72  | similar to Dynein heavy chain 5, axonemal                               |
| NM_001192177 | CLSPN      | 0.004 | 2.24  | claspin                                                                 |
| ENSBTAT0000  | RYR3       | 0.039 | 2.00  | ryanodine receptor 3                                                    |
| XM_590977    | BCORL1     | 0.006 | -1.50 | BCL6 corepressor-like 1                                                 |
| NM_174288    | CRTL1      | 0.029 | 1.85  | cartilage linking protein 1                                             |
| NM_001099378 | SLC15A1    | 0.040 | 1.64  | solute carrier family 15 (oligopeptide transporter), member 1           |
| XM_602101    | ABCB4      | 0.028 | 2.12  | ATP-binding cassette, sub-family B (MDR/TAP), member 4                  |
| NM_001206294 | GIPC3      | 0.002 | 2.35  | GIPC PDZ domain containing family, member 3                             |
| XM_864611    | SIM1       | 0.025 | -1.64 | single-minded homolog 1 (Drosophila)                                    |
| NM_001109962 | DCLK1      | 0.024 | -2.14 | doublecortin-like kinase 1                                              |
| EE910096     | A37090A    | 0.046 | 2.31  | FFB Bos taurus cDNA clone A3709 5-                                      |
| XM_613195    | LHX4       | 0.035 | 1.73  | LIM homeobox 4                                                          |
| XM_866545    | IRX4       | 0.031 | 1.96  | iroquois homeobox protein 4                                             |
| NM_001192310 | RTKN2      | 0.007 | 1.69  | rhotekin 2                                                              |
| NM_001082456 | WNT11      | 0.007 | -1.80 | wingless-type MMTV integration site family, member 11                   |
| NM_001001443 | LOC407238  | 0.043 | 1.81  | estrogen receptor alpha                                                 |
| BF606645     |            | 0.023 | 1.68  | MARC 3BOV Bos taurus cDNA 5-                                            |
| CB170988     | TRQ6030013 | 0.035 | 1.55  | CSEQFN22 thyroid and parathyroid                                        |
| AW325465     |            | 0.016 | 1.85  | 16151 MARC 4BOV Bos taurus cDNA 5-                                      |

|              |           |       |       |                                                                 |
|--------------|-----------|-------|-------|-----------------------------------------------------------------|
| NM_001014910 | HBE4      | 0.025 | 1.99  | hemoglobin, beta, epsilon 4                                     |
| NM_174007    | CCL8      | 0.033 | 1.82  | chemokine (C-C motif) ligand 8                                  |
| XM_002687245 | KRT77     | 0.021 | -1.70 | keratin 77                                                      |
| XM_584248    | LOC507604 | 0.001 | -2.03 | similar to Kinesin-like protein KIF1B (Klp)                     |
| NM_001098379 | IL22      | 0.013 | 1.50  | interleukin 22                                                  |
| NM_001100349 | AMPD1     | 0.036 | 2.12  | adenosine monophosphate deaminase 1 (isoform M)                 |
| ENSBTAT0000  | UGGT2     | 0.041 | 1.80  | UDP-glucose glycoprotein glucosyltransferase 2                  |
| NM_001024506 | IRF9      | 0.044 | 1.59  | interferon regulatory factor 9                                  |
| XM_587381    | LOC510256 | 0.017 | -2.04 | similar to SV2 related protein                                  |
| CB440453     |           | 0.025 | 1.54  | MARC 6BOV Bos taurus cDNA 3                                     |
| XM_602041    | LOC523738 | 0.036 | 1.50  | similar to tripartite motif protein 17                          |
| EE908476     | A28420A   | 0.026 | -3.14 | FFB Bos taurus cDNA clone A2842 5-                              |
| NM_001206148 | TXK       | 0.017 | 1.57  | TXK tyrosine kinase                                             |
| NM_001077909 | INSIG1    | 0.027 | -1.50 | insulin induced gene 1                                          |
| XM_600886    | LOC522601 | 0.011 | 1.50  | similar to dentin sialophosphoprotein preproprotein             |
| NM_001076092 | DZIP3     | 0.034 | 1.57  | DAZ interacting protein 3, zinc finger                          |
| XM_865632    | NEFH      | 0.038 | 2.58  | neurofilament, heavy polypeptide                                |
| NM_001075414 | IFIT3     | 0.003 | 2.33  | interferon-induced protein with tetratricopeptide repeats 3     |
| XM_869498    | AMAN      | 0.050 | 1.67  | similar to Epididymis-specific alpha-mannosidase precursor      |
| XM_592839    | LOC540268 | 0.016 | 1.72  | hypothetical LOC540268                                          |
| BC133554     | LOC614587 | 0.043 | 1.62  | similar to Uncharacterized protein C10orf90                     |
| CB451086     |           | 0.008 | 2.11  | MARC 6BOV Bos taurus cDNA 3-                                    |
| NM_001098461 | SLC6A14   | 0.017 | 2.69  | solute carrier family 6 (amino acid transporter), member 14     |
| XM_002687880 | FGF23     | 0.026 | 2.56  | fibroblast growth factor 23                                     |
| XM_867744    | RBM15B    | 0.010 | -2.20 | RNA binding motif protein 15B                                   |
| CB440543     |           | 0.039 | -1.71 | MARC 6BOV Bos taurus cDNA 5-                                    |
| XM_612397    | LOC540631 | 0.023 | -1.59 | similar to kelch-like 23                                        |
| NM_001033761 | TLR7      | 0.032 | 1.60  | toll-like receptor 7                                            |
| NM_174654    | SLCO1A2   | 0.002 | -1.62 | solute carrier organic anion transporter family, member 1A2     |
| XM_582333    | LOC505959 | 0.016 | 4.48  | similar to Potassium voltage-gated channel subfamily H member 8 |
| NM_001046353 | SULT2A1   | 0.003 | -1.56 | sulfotransferase family, cytosolic, 2A                          |
| NM_001015610 | PLA1A     | 0.026 | 1.81  | phospholipase A1 member A                                       |

|              |            |       |       |                                                            |
|--------------|------------|-------|-------|------------------------------------------------------------|
| XM_868741    | CCDC7      | 0.009 | -1.90 | coiled-coil domain containing 7, transcript variant X3     |
| XM_604156    | LOC525800  | 0.041 | 1.86  | hypothetical LOC525800                                     |
| NM_001078020 | DDI1       | 0.022 | -1.50 | DDI1, DNA-damage inducible 1, homolog 1                    |
| XM_866470    | LOC614830  | 0.001 | 1.56  | similar to RAB6A, member RAS oncogene family               |
| XM_581305    | WNT6       | 0.042 | -1.56 | wingless-type MMTV integration site family, member 6       |
| NM_180997    | IL2        | 0.014 | 2.00  | interleukin 2                                              |
| NM_001192486 | ADAMTS18   | 0.006 | -1.57 | ADAM metallopeptidase with thrombospondin type 1 motif, 18 |
| NM_001098902 | CDH17      | 0.019 | 2.28  | cadherin 17, LI cadherin                                   |
| BC109539     | LOC520778  | 0.023 | -1.70 | similar to ubiquilin 2                                     |
| XM_605253    | UNC13A     | 0.021 | -2.08 | unc-13 homolog A (C. elegans)                              |
| XM_003582336 | TMPRSS11B  | 0.006 | 5.59  | transmembrane protease, serine 11B                         |
| NM_174619    | STXBP1     | 0.023 | 1.61  | syntaxin binding protein 1                                 |
| XM_580501    | LOC504388  | 0.005 | 1.98  | olfactory receptor 1307-like                               |
| XM_589867    | LOC539857  | 0.032 | 2.33  | similar to Protocadherin alpha 10 precursor                |
| NM_001205843 | CASP14     | 0.003 | 1.60  | caspase 14, apoptosis-related cysteine peptidase           |
| NM_001075890 | KLK10      | 0.042 | 1.68  | kallikrein-related peptidase 10                            |
| NM_001192224 | RRH        | 0.010 | 1.95  | retinal pigment epithelium-derived rhodopsin homolog       |
| NM_001076020 | CADPS      | 0.004 | -1.82 | Ca <sup>++</sup> -dependent secretion activator            |
| XM_001788530 | LOC787880  | 0.035 | 3.42  | similar to Synaptotagmin-14 (Synaptotagmin XIV)            |
| NM_001015550 | CDH16      | 0.005 | 1.76  | cadherin 16, KSP-cadherin                                  |
| NM_001206865 | LOC617781  | 0.050 | 1.73  | similar to Uncharacterized protein C12orf34                |
| NM_174042    | DRD1       | 0.023 | 2.98  | dopamine receptor D1                                       |
| XM_581757    | LOC505468  | 0.004 | 2.02  | cytochrome P450 2C19                                       |
| XM_864633    | LOC613645  | 0.037 | -1.56 | similar to regulating synaptic membrane exocytosis 2       |
| XM_867850    | C3H1orf177 | 0.003 | -1.77 | similar to Uncharacterized protein C1orf177                |
