# Supplementary material for: High-concentrate feeding upregulates the expression of inflammation-related genes in the ruminal epithelium of dairy cattle
Source: PubMed Central journal article supplement (PMC4966727; doi:10.1186/s40104-016-0100-1), 2016-07-29
Supplement: 40104_2016_100_MOESM3_ESM.pdf [file 40104_2016_100_MOESM3_ESM.pdf]

Table S3 Enriched GO terms (only significantly enriched GO terms were listed)

| GO ID     | Level | Description                                        | Hits | Enrichment | Genes                                  |
|-----------|-------|----------------------------------------------------|------|------------|----------------------------------------|
| GO:003024 | 3     | carbohydrate binding                               | 5    | 0.026      | COLEC11, CXCL6, TINAG, SFTP, MF        |
| GO:001545 | 2     | auxiliary transport protein activity               | 2    | 0.046      | SCN4B, DZIP3 MF                        |
| GO:001624 | 3     | channel regulator activity                         | 2    | 0.046      | SCN4B, DZIP3 MF                        |
| GO:001085 | 3     | cyclase regulator activity                         | 1    | 0.045      | GUCA1B MF                              |
| GO:004442 | 2     | extracellular region part                          | 13   | 0.014      | COLEC11, CXCL6, CCL19, BSP1, CC        |
| GO:000557 | 2     | extracellular region                               | 18   | 0.015      | SPINK1, COLEC11, HTRA4, CXCL6, CC      |
| GO:005164 | 3     | establishment of localization in cell              | 15   | 0.001      | SCIN, RAB3A, MYLK2, GDAP1, ITBP        |
| GO:000695 | 3     | immune response                                    | 11   | 0.002      | CX3CR1, CXCL6, CCL19, BOLA-1, BP       |
| GO:005164 | 3     | cellular localization                              | 15   | 0.003      | SCIN, RAB3A, MYLK2, GDAP1, ITBP        |
| GO:000181 | 3     | cytokine production                                | 6    | 0.005      | CXCL6, IL6, IL1B, IRF9, TLR7, IL1, BP  |
| GO:000177 | 3     | leukocyte homeostasis                              | 3    | 0.007      | CXCL6, IL6, IL2 BP                     |
| GO:001972 | 3     | cellular homeostasis                               | 8    | 0.008      | DZIP3, DHRS7C, IL6, SCN4B, TXNIP, BP   |
| GO:003287 | 3     | regulation of localization                         | 10   | 0.01       | SCIN, RAB3A, MYLK2, DHRS7C, BP         |
| GO:005123 | 3     | regulation of multicellular organismal process     | 13   | 0.011      | SCIN, RAB3A, MYLK2, CX3CR1, BP         |
| GO:004233 | 3     | taxis                                              | 4    | 0.011      | CX3CR1, CXCL6, IL1B, CCL8 BP           |
| GO:000237 | 2     | immune system process                              | 13   | 0.012      | SCIN, CX3CR1, CXCL6, CCL19, B2M, BP    |
| GO:005128 | 3     | negative regulation of sequestering of calcium ion | 2    | 0.016      | DHRS7C, DRD1 BP                        |
| GO:003284 | 3     | regulation of homeostatic process                  | 3    | 0.025      | DHRS7C, IL2, DRD1 BP                   |
| GO:000165 | 3     | temperature homeostasis                            | 2    | 0.028      | IL1B, DRD1 BP                          |
| GO:005109 | 3     | negative regulation of developmental process       | 8    | 0.038      | DZIP3, CX3CR1, KCNA3, IL1B, ITBP       |
| GO:000681 | 3     | transport                                          | 25   | 0.04       | SCIN, RAB3A, MYLK2, KCND3, CACNA1C, BP |
| GO:005170 | 3     | response to other organism                         | 5    | 0.041      | CXCL6, IL6, KRT8, IL1B, TLR7 BP        |
| GO:005123 | 3     | maintenance of location                            | 3    | 0.041      | DHRS7C, IL1B, DRD1 BP                  |
| GO:003250 | 2     | multicellular organismal process                   | 27   | 0.042      | HOXC11, COLEC11, SCIN, GUCA1B, BP      |
| GO:005123 | 2     | establishment of localization                      | 25   | 0.043      | SCIN, RAB3A, MYLK2, KCND3, CACNA1C, BP |
| GO:002170 | 3     | developmental maturation                           | 3    | 0.044      | RAB3A, BSP1, STXBP1 BP                 |
| GO:006500 | 3     | regulation of biological quality                   | 15   | 0.047      | DZIP3, SCIN, RAB3A, HTRA4, CXCL6, BP   |
